# Supplementary material
Source: PubMed Central journal article supplement (PMC4933599)
Supplement: supp_4.2.E277_2016-0001_Original_submission.pdf [file supp_4.2.E277_2016-0001_Original_submission.pdf]

**Introduction:**

Population health studies report that Aboriginal peoples (a term which includes Canada's First Nations, Inuit and Metis peoples) continue to have poorer health and shorter life expectancies when compared to the Canadian population as a whole[1][2]. New research has indicated that Aboriginal peoples are also less likely to seek medical attention from urban health care services due to feeling “judged, ignored, stereotyped, racialized and minimized”[3].

Across Canada, efforts are being made to improve health care delivery and address the health inequities of Aboriginal peoples. These efforts are meant to create health care environments “free of racism and stereotypes, where Aboriginal people are treated with empathy, dignity and respect”[4]. For instance, urban health centres in numerous provinces have created “Aboriginal patient navigators” to help reconcile relationships between Aboriginal patients and western health care providers[5]. In British Columbia, the Provincial Health Services Authority launched an online module called the “Indigenous Cultural Competency Training Program”, which is the first province-wide mandatory cultural training program for health authorities. The importance of such initiatives is highlighted in a recent report by the Truth and Reconciliation Commission report about the experiences of Aboriginal students in residential schools[6]. The report specifically calls upon health care institutions to train their providers in cultural safety and to teach them about how the traumatic residential school experiences have engendered significant personal and social costs for the survivors.

Since 1972, over 2000 students from Southern Ontario participated in electives in Northwestern Ontario through the Northwestern Ontario Medical Programme[7]. Trainees continue to travel to Canadian rural areas for a “Third World” experience but may not have

1  
2  
3 prior knowledge about the social and cultural circumstances of the communities. Frequently,  
4  
5 communities accommodating trainees have significant populations of Aboriginal peoples.  
6

7 In keeping with the World Health Organisation's report on "social accountability",  
8  
9 medical schools are encouraged to focus educational and research initiatives on the specific  
10  
11 health needs of the communities they serve[8]. Physicians, residents or medical students  
12  
13 travelling to Northern communities, whether for a short or long period of time, owe a duty to  
14  
15 the community which encompasses pre-requisite education. Similarly, the Indigenous  
16  
17 Physicians Association of Canada (IPAC) and the Royal College of Physicians and Surgeons  
18  
19 of Canada (RCPSC) have recognised that education is essential to improving care to  
20  
21 Canada's Aboriginal peoples, both in Northern communities and in urban environments. In  
22  
23 2009, the IPAC-RCPSC Advisory Committee developed a core training module to help  
24  
25 residents and physicians understand the "social, political, linguistic, economic and spiritual  
26  
27 realm" of First Nation, Inuit and Metis patients[9]. Despite these initiatives, no nationwide  
28  
29 mandate currently exists requiring health care providers or medical trainees to complete  
30  
31 education on cultural competency.  
32  
33  
34  
35

36 This research was aimed at exploring the northern perspective towards trainees  
37  
38 traveling to these regions without adequate education. The objectives of the study were to  
39  
40 learn from the inhabitants of a rural Canadian community, including the Aboriginal  
41  
42 population, what medical students and residents need to know/learn/experience to be  
43  
44 adequately educated to travel there as part of their medical training and/or subsequent  
45  
46 practice.  
47  
48

49 **Methods:**

50 **Setting:**

51  
52 Our research was conducted in Kenora, a town of 15 348 people in Northwestern  
53  
54 Ontario near the Manitoba border. There is a large Aboriginal population, with 2365 (15.4%)  
55  
56  
57  
58  
59  
60

1  
2  
3 inhabitants reporting “Aboriginal identity”, (defined as either Metis, Inuit, North American  
4  
5 Indian Status or Non-Status First Nation) making it the largest concentration of Aboriginal  
6  
7 inhabitants of all Ontario towns[10]. Kenora is surrounded by 13 Aboriginal reservations  
8  
9 including Rat Portage, Shoal Lake, and Ochiichagwe’ Babigo’ Ining Ojibway Nation. Medical  
10  
11 students and residents have been traveling to Kenora through the Northwestern Ontario  
12  
13 Medical Program (NOMP), since 1972. This program was a collaborative effort between  
14  
15 Thunder Bay and McMaster University to recruit and maintain doctors in Northwestern rural  
16  
17 and remote communities[11]. The longstanding history of trainees coming from Southern  
18  
19 Ontario and the significant Aboriginal population made Kenora an ideal location for our  
20  
21 research.  
22  
23

#### 24 25 **Study Design and Sampling:** 26

27  
28 Historically, research conducted within Aboriginal communities often did not directly  
29  
30 involve their input or reflect their values or beliefs[12]. Results from projects conducted in  
31  
32 these areas, in turn, may not have benefitted the people, causing Aboriginal peoples to view  
33  
34 research within their communities with apprehension[13][14]. To ensure our research was  
35  
36 collaborative with the Kenora community, a research agreement was drafted between a local  
37  
38 Aboriginal Health Care Access Centre (Waasegiizhig Nanaandawe’iyewigamig, or WNHAC)  
39  
40 and the primary research team (see Appendix 1). The document specified commitments  
41  
42 regarding “collective community participation and decision making, sharing of benefits and  
43  
44 review”[15]. These concepts are in keeping with the primary principles of research with  
45  
46 Aboriginal communities including mutual responsibilities in project design, data collection  
47  
48 and management all the way to ownership, access and possession of data. Ethics approval  
49  
50 was obtained from the University of Toronto Research Ethics Board.  
51  
52

53  
54 With the help of the core collaborator group and WNHAC, a preliminary purposive  
55  
56 sample was created for initial interviews. Eligible participants included, but were not limited  
57  
58  
59  
60

1  
2  
3 to, health care workers and community members who had previously interacted with medical  
4  
5 students or residents from Southern Ontario medical schools including the University of  
6  
7 Toronto. Interviews were set up to allow preliminary analysis of results, to allow iterative  
8  
9 adjustment to the interview script and study sample. Subsequent interviewees were chosen  
10  
11 both through purposive sampling and through snowball sampling (“sampling participants  
12  
13 found by asking current participants in a study to recommend others whose experiences  
14  
15 would be relevant to the study”)[16].  
16  
17

### 18 **Data Collection and Analysis:**

19  
20 Interviews were conducted semi-structured by the primary investigator. An interview  
21  
22 guide was created in collaboration with the primary research team and members of a core  
23  
24 collaborator group, including representative from WNHAC (see Appendix 2). Interviews  
25  
26 were recorded and anonymised onto a digital recording device, then later transcribed  
27  
28 verbatim by the primary investigator. Constant concurrent comparative analysis allowed  
29  
30 theoretic coding of the data within a critical constructivist framework based on decolonizing  
31  
32 Indigenous research methodology[17]. Themes were refined through discussion among the  
33  
34 authors who represented Indigenous and non-Indigenous critical perspectives as well as life  
35  
36 experiences in both Northern and Southern Ontario. Purposive sampling was used to address  
37  
38 gaps identified in the initial data. The results reviewed with representatives from WNHAC  
39  
40 prior to submission, as outlined in the “Possession section” of the research agreement.  
41  
42  
43  
44

### 45 **Results:**

46  
47 In total, 17 semi-structured interviews were conducted between February and March  
48  
49 2014. Interviewees consisted of community members and health care employees who self-  
50  
51 identified as either Aboriginals or non-Aboriginals  
52  
53

### 54 **Southern Trainees in Northern Ontario:**

1  
2  
3 Of the 17 interview subjects, 13 of them had previous experience with medical  
4 students or residents from either Southern Ontario medical schools or the Northern Ontario  
5 School of Medicine (NOSM). NOSM was established in 2005 with a mandate to train doctors  
6 to serve Northern Ontario's urban and remote communities. NOSM is the only Canadian  
7 medical school to have developed a core curriculum in Aboriginal health which includes a  
8 four week Aboriginal cultural immersion placement in year 1[18].  
9  
10  
11  
12  
13  
14  
15

16 Some interviewees commented specifically on negative interactions between the  
17 Southern Ontario trainees and members of the Kenora community, all during interactions  
18 with the Aboriginal population. Some Southern trainees were found to lack a basic  
19 understanding of the geographical barriers for Aboriginals to access health care, resulting in  
20 poor compliance to treatment plans. Interviewees with direct interactions with Southern  
21 Ontario trainees also commented on their lack of knowledge surrounding important historical  
22 events. Another health care professional recalled a Southern trainee making racist comments  
23 during their rotation.  
24  
25  
26  
27  
28  
29  
30  
31  
32  
33

34 "I just remember one in particular because we were sharing some of the stuff about  
35 residential schools and roles of the elders, stuff like that. He was Canadian, and had  
36 no idea, had never heard of this 60s scoop or anything like that. So that was really  
37 shocking to me." INTERVIEW 10  
38  
39  
40  
41  
42

43 "Almost always there was very little knowledge in the group. And that's one of the  
44 reasons we had the content that we did. Because we realized that you don't get this in  
45 your health care training program." INTERVIEW 10  
46  
47  
48

49 "The only time they've seen a reserve is Six Nations. So they see these very high end,  
50 organized, beautiful places and that's their experience of what a First Nations reserve  
51 is like ... So they don't understand what reserves in the rest of Canada are like. They  
52  
53  
54  
55  
56  
57  
58  
59  
60

1  
2  
3 don't have a good appreciation of residential schools or the Third World living  
4 conditions that exist right within our community.” INTERVIEW 13  
5  
6

7 “I've had a couple individuals from Toronto come down ... I think they were  
8 frustrated ... Without taking into account their patients can't afford to go to Kenora, or  
9 they can't afford time off work or the day that it takes with the medical van. That sort  
10 of judgment came across and it wasn't appreciated by the population.” INTERVIEW  
11  
12  
13  
14  
15  
16  
17  
18  
19

20 Many of the health care employees interviewed commented on the difference between  
21 NOSM and Southern Ontario trainees. The interviewees observed that NOSM students had  
22 superior baseline knowledge on the historical, political and geographical issues affecting  
23 rural communities.  
24  
25  
26

27 “You know since NOSM University has been around they are way more prepared  
28 than the other universities. I think they have a community component to their  
29 curriculum.” INTERVIEW 1  
30  
31  
32  
33

34 “I do know just through a friend that did the Northern Ontario School of medicine that  
35 they receive a lot of education on the First Nation culture. And she did feel prepared  
36 for those conversations.” INTERVIEW 4  
37  
38  
39

40 “Are the northern students that much more aware? I would say they are, but they still  
41 have a lot to learn ... in their first three months they are out already on their first  
42 northern placement. It's not necessarily a clinical one, it's an immersion in the culture  
43 and they are sent to different First Nations communities for four weeks. So their  
44 awareness and knowledge really develops very early in the program. As far as living  
45 conditions, social economic conditions, health challenges.” INTERVIEW 10  
46  
47  
48  
49  
50  
51  
52

53 “There's five NOSM students right now, some of them are from the north ... I think  
54 they have a better appreciation and understanding of the demographic in the region  
55  
56  
57  
58  
59  
60

1  
2  
3 than someone coming from Toronto who have never maybe been on a reserve ... I  
4  
5 think a lot of the students we have right now from NOSM have a pretty good  
6  
7 appreciation of the social deprivation that exists in some of these far north  
8  
9 communities ... So I think there is a difference, I think for some of our students that  
10  
11 we had from the Toronto area, aren't familiar with the North.” INTERVIEW 11  
12  
13

#### 14 **Determinants of Health Affecting the Aboriginal Community:**

##### 15 *Access to Health Care:*

16  
17  
18 There was a unanimous consensus that poor access to health care is a significant  
19  
20 determinant of health among the Aboriginal population, especially those residing on reserves  
21  
22 outside the city of Kenora. While some communities have clinics or health centers, many  
23  
24 interviewees felt they were understaffed and/or inadequately equipped to perform the simple  
25  
26 services such as X-Rays, blood work or ECG's, commonly performed in hospital. Without  
27  
28 the skills or equipment, patients on reserves must find other ways to obtain care, often  
29  
30 delaying diagnosis and/or treatment.  
31  
32

33  
34 “Yes there are clinics in the community. Some of them have everything and some of  
35  
36 them have nothing. So we have to bring our own stuff like pap lights and blood  
37  
38 pressure cuffs.” INTERVIEW 1  
39

40  
41 “No we don't have ECGs, there's no testing done here. We're more of a health center  
42  
43 than a medical center. The only professions that are here are the nurses and the nurse  
44  
45 practitioner.” INTERVIEW 5  
46

47  
48 “I'm waiting for an answer to see when we're going to get our new healthcare facility.  
49  
50 This one is very small we're overcrowded we don't have a lot of places to put storage.  
51  
52 We don't have anywhere to put medical files.” INTERVIEW 5  
53

54  
55 “They have nurses. There are two of them that live there Monday through Friday. But  
56  
57 there's no one there on the weekends. They do have access to first response services,  
58  
59  
60

1  
2  
3 there's a team of trained individuals for first response. But they are over utilized and  
4 they get burnt out. So there's a high turnover.” INTERVIEW 15  
5  
6

7 The importance of having clinics located on the reserve becomes evident when you  
8 consider some of these communities are hundreds of kilometers from the nearest hospital.  
9  
10 During the winter months, many of the roads are inaccessible and community members may  
11 not have access to a vehicle.  
12  
13  
14

15  
16 “It's getting into work early, loading up all our supplies and traveling through all  
17 kinds of treacherous conditions of the road. It's traveling an hour to two hours and  
18 maybe spending four hours in the community and then coming back.” INTERVIEW 1  
19  
20  
21

22 “Some communities have nursing stations that have home care services or have  
23 medical drivers that can get people to town... but if a student doesn't realize that  
24 someone might not be able to get to town because it's over an hour away and it's \$100  
25 and they can't afford to get into town.” INTERVIEW 11  
26  
27  
28  
29

30 “It's 110 km north of Kenora so it takes just over an hour to drive. Sometimes the  
31 road's out, which always makes it exciting ... It's a regular road but several areas along  
32 the road they have washouts because of water and culverts are not maintained ... And  
33 often they have to close it for repairs, so you can travel through it. They only open it  
34 up to let people through for one hour a day, so it really limits the travel to the  
35 community. INTERVIEW 15  
36  
37  
38  
39  
40  
41  
42  
43

44 On the other hand, some of the interviewees commented on an overall improvement  
45 in access to health care with the development of roads, the helicopter service operating out of  
46 the hospital, and physicians traveling to reserves.  
47  
48  
49  
50

51 “Probably the access to the hospital is easier now than it was 40 years ago because of  
52 roads and because of the helicopter. The helicopter brings a lot of people from the  
53 reserves.” INTERVIEW 3  
54  
55  
56  
57  
58  
59  
60



1  
2  
3 “A lot of the family doctors have adopted a First Nations community. So they are  
4 receiving care at that level to.” INTERVIEW 4  
5  
6

7 “The outreach of physicians going to the communities has had a world of change.”

8  
9 INTERVIEW 16  
10

11 *Residential School Influence:*  
12

13  
14 Each of the 17 interviewees commented on the pervasive effect that residential  
15 schools continue to have on the local Aboriginal community.  
16

17  
18 “There are a lot of negative impacts that happened from the residential school and that  
19 goes into each generation.” INTERVIEW 7  
20  
21

22 “The history, of colonization and residential schools how that has affected our  
23 population here ... people don't understand, they don't make the connection that your  
24 ER patient today, how it affected their family and their mothers their grandparents or  
25 themselves.” INTERVIEW 8  
26  
27

28 “I think it had a profound impact on the native community. That finally something  
29 was acknowledged about what we did to the Native people. As heartbreaking as it was  
30 it needs to be told.” INTERVIEW 12  
31  
32

33 “Generations of disruption, that nobody knows how to raise kids, survive as a family,  
34 survive without intoxicants which help you forget about all the other stuff that you  
35 don't want to remember.” INTERVIEW 13  
36  
37

38 “So we are trying to deal with the residential school and those impacts. We try to have  
39 sharing circles and I think we need to work on that awareness. The healing has to  
40 happen from their own hearts.” INTERVIEW 14  
41  
42

43 “I expected to see the legacy of the residential schools and that would all be starting  
44 to fade and we'd be seeing a light but it's no different now than it was 20 years ago. In  
45 fact in some cases it's worse.” INTERVIEW 16  
46  
47  
48  
49  
50  
51  
52  
53  
54  
55  
56  
57  
58  
59  
60

**Patient and Provider Specific Factors Affecting Delivery of Care:***Provider Specific Characteristics:*

Every interviewee offered perspective on the characteristics of health care employees that facilitate culturally safe care. Being respectful, empathetic and a good listener were consistently emphasized.

“I think if you're dealing with somebody who has some degree of empathy, and patients, and a little bit of understanding, I mean you don't need anything more than that.” INTERVIEW 3

“Being respectful and kind. I think that of many different cultures, so if you're being respectful to an individual and asking them how can I help you, I think that can be perceived too as appropriate cultural care.” INTERVIEW 4

“When I have students with me I really remind them to have good listening skills. This sometimes means a lot of time and not talking. I do believe that you can then deliver quicker healthcare in the longer term because you can understand the patient and you're probably going to get better compliance.” INTERVIEW 10

“White healthcare people have not walked in the same types of shoes. We are so quick to talk and to give information and instructions and recommendations and with the First Nations population, you have to be a good listener and give time for someone to tell their story.” INTERVIEW 10

“Learn how to listen to the stories that the elders have to share. Sometimes the stories are pretty long but being able to really listen to them and take the little seeds are pearls of wisdom and if you learn how to do that you're going to benefit an awful lot. And you're going to find the time you're in that First Nation community a lot better a lot easier.” INTERVIEW 17

1  
2  
3 In addition to being a good listener, interviewees emphasized good communication  
4 skills as essential to facilitating meaningful relationships with patients. Interviewees  
5 described being direct and using simple language as effective strategies for communication.  
6  
7

8  
9  
10 “On a more macro level it's ensuring that there's really good communication in a  
11 manner that is received and then confirming that information has been received. So  
12 that might be making sure there is information available in Ojibway or Cree that  
13 there's translators available.” INTERVIEW 16  
14  
15  
16  
17

18 *Patient Specific Factors:*  
19

20 Interviewees commented that some Aboriginals mistrust the Western health care  
21 system, or prefer to use traditional medicines. This mistrust is an obvious obstacle in  
22 developing comprehensive patient care plans, and in creating meaningful patient-provider  
23 relationships.  
24  
25  
26  
27  
28

29  
30 “We do have part of our community that's at the far end and they are very untrusting.  
31 The grandfather got a flu shot and the next day he died. So they really thought that it  
32 was the flu shot that killed him. And I think to this day it's really hard to break that  
33 barrier.” INTERVIEW 5  
34  
35  
36  
37

38 The interviewees who were health care employees for the most part were accepting of  
39 traditional medicines and their unique role in the overall health of the Aboriginal community.  
40 However, they suggested using traditional medications with caution in combination with  
41 other pharmaceuticals.  
42  
43  
44  
45  
46

47 “I don't stop people having it. I think that sweats help because of the psychological  
48 component. I think Indian medicines help again for the psychological component. If  
49 you need an antibiotic, like if they have a rip roaring impetigo or cellulitis I say you  
50 can use your Indian medicine but will give ours as well. So you can overlap it. See I  
51  
52  
53  
54  
55  
56  
57  
58  
59  
60

1  
2  
3 will do a deal, you can carry on with your Indian medicine and I'll give you some  
4  
5 white man stuff.” INTERVIEW 9

6  
7 “And I'm fine with people using native medicine; they need to be careful about  
8  
9 interactions because there are some very powerful roots and herbs.” INTERVIEW 13

10  
11 “I think from a mental health perspective, the sweats and the sage smoking is very  
12  
13 therapeutic. It is a negotiation with those patients to come to some sort of common  
14  
15 ground to say okay, I'm okay with you using your traditional medicine but I think it's  
16  
17 in your best health issue to also consider using this medicine.” INTERVIEW 15

18  
19 Finally, some interviewees explored fundamental cultural differences that may strain  
20  
21 relationships between health care provider and patient.  
22

23  
24 “It's understanding the very different attitude just towards parenting, towards social  
25  
26 intervention, the concept of noninterference which is totally at odds with our jobs ...  
27  
28 Western medicine is based on a concept of direct interference and the First Nations  
29  
30 approach is noninterference and it applies to parenting and it applies to healthcare and  
31  
32 applies to justice.” INTERVIEW 16  
33  
34  
35

### 36 **New Curriculum for Education of Southern Ontario Trainees:**

37  
38 All of the 17 interviewees felt that a pre-departure curriculum would be beneficial.

39  
40 “It would be good for them to be prepared so that when they come they are aware of  
41  
42 the stressors in the community ... And what did it stem from.” INTERVIEW 4

43  
44 “You could probably do an introductory type session; go over the pertinent social  
45  
46 problems. Maybe some of the social dynamic issues about negotiating with patients  
47  
48 and that you will are not going to get everything on your optimal care list. And what's  
49  
50 available, the cost of transportation, what's involved time-wise. Because in Toronto  
51  
52 everything's there. And the expectation when they go elsewhere is that it should be  
53  
54 there.” INTERVIEW 15  
55  
56  
57  
58  
59  
60

1  
2  
3 “I think it's a really good idea to go over that before you come because then when you  
4 have that first patient in your office who has multiple co-morbidities, you have an  
5 understanding of where they're coming from ... So certainly a historical perspective  
6 would make it a little easier.” INTERVIEW 16  
7  
8

9  
10  
11 “Knowing a little bit about the geography, some of the history of the community, of  
12 the First Nations people. Certainly with the First Nations people an understanding of  
13 the Indian Act, the residential schools and the impact that it had over the generations.”  
14  
15  
16  
17  
18 INTERVIEW 17  
19

20  
21 Interviewees also identified the need to instruct trainees on some of the nuances  
22 surrounding effective communication with the Aboriginal population within the curriculum.  
23

24  
25 “An appreciation for how to communicate, knowing that not looking people in the eye  
26 is not rude, if people don't look at you it's not that they're ignoring you. INTERVIEW  
27  
28  
29  
30  
31  
32  
33  
34  
35  
36  
37  
38  
39  
40  
41  
42  
43  
44  
45  
46  
47  
48  
49  
50  
51  
52  
53  
54  
55  
56  
57  
58  
59  
60

“Some cultural interactions, like how to interact with the First Nations people ... they  
don't make eye contact, they often make a number of gestures. If you could make an  
effort to make or to learn a few words in their local language goes a long way to  
develop more rapport.” INTERVIEW 15

“The nonverbal aspects, the eye contact ... don't make it direct until they feel more  
comfortable with you.” INTERVIEW 17

In addition to a pre-departure curriculum, the interviewees suggested an immersive  
experience to teach trainees about the complexities of Northern Ontario. This experience  
could include spending time in an Aboriginal community, having story-telling sessions with  
native Elders, or participating in traditional ceremonies.

1  
2  
3 “I think if they attend a sweat lodge ceremony and learn the rationale behind it why to  
4 do it. You will gain a better perception of what the cultures and beliefs are.”

5  
6  
7 INTERVIEW 6

8  
9  
10 “I think every doctor that comes out should have some training in a First Nations  
11 community.” INTERVIEW 7

12  
13  
14 “We have had some storytelling from elders ... that is the most profound  
15 understanding that you can get.” INTERVIEW 8

16  
17  
18 “We have lots of students that want to go on Third World placements, and we say not  
19 to put down our region but you can get a Third World experience in Northern  
20 Ontario.” INTERVIEW 10

21  
22  
23 “I think that maybe they can be given some resources or something in advance to help  
24 orient themselves. But I think it's really successfully done as an immersion approach  
25 when you're here, and you can learn and integrate and apply all of the same time,  
26 simultaneously.” INTERVIEW 10

27  
28  
29 “There's nothing that will overtake hands-on experiential learning. But if everybody  
30 had a half day or a day of immersive learning certainly people do a lot of, bring a lot  
31 of culture stuff into their teachings. INTERVIEW 13

32  
33  
34 “I think spending time on a First Nations community is probably the best way to  
35 really understand and appreciate the challenges and the healthcare challenges.”

36  
37  
38 INTERVIEW 16

39  
40  
41  
42  
43  
44  
45  
46  
47  
48  
49  
50  
51  
52  
53  
54  
55  
56  
57  
58  
59  
60  
Some of the interviewees discussed the concept of mentorship (having a preceptor to help with the educational and practical aspects of a placement) as beneficial for students and residents coming to Northern Ontario for the first time.

1  
2  
3 “Say if you're going to work for someone like WHNAC, you know the people there  
4  
5 are really awesome. They don't need to, but they'll bring you with them and they will  
6  
7 introduce you, introductions are made a kind of ease you into it.” INTERVIEW 5  
8

9  
10 “When people come and go for short term, it's the best when they go with the  
11  
12 physicians because the physicians are really community involved ... But we are their  
13  
14 gateway to the community for the students and residents.” INTERVIEW 13  
15

16 **Discussion:**

17  
18 Many publications exist regarding medical elective tourism in the global setting, but  
19  
20 there is no current literature focusing on what education is needed for medical students and  
21  
22 residents prior to traveling to Northern Ontario. Using a collaborative methodology, we were  
23  
24 able to gain the perspective of a Northern Ontario community about what elements should be  
25  
26 incorporated into a pre-departure curriculum for Southern Ontario trainees wishing to travel  
27  
28 there on elective.  
29  
30

31  
32 The interviewees who had worked previously with Southern Ontario trainees felt they  
33  
34 were inadequately educated about Northern politics, society and history. All interviewees felt  
35  
36 that a pre-departure curriculum would be beneficial to mitigate deficiencies in knowledge.  
37  
38 The agreed unanimously about the content, that it should include information on the political,  
39  
40 historical, and social determinants of health affecting the Aboriginal populations in Northern  
41  
42 Ontario. They also felt education on historical events like the Indian Act is important to  
43  
44 understanding the current health structure, and how services in care delivery are organized  
45  
46 for the Aboriginal population. Incorporating didactic sessions with an integrative immersive  
47  
48 approach while in Northern Ontario was felt to be a more effective way for students to  
49  
50 understand the area and to collaborate more successfully with the Aboriginal community. The  
51  
52 importance of good mentorship during the placement, and education to improve  
53  
54  
55  
56  
57  
58  
59  
60

1  
2  
3 communication were also identified. As a result, the trainees will feel more prepared, deliver  
4 appropriate, culturally competent care and have an overall better educational experience.  
5  
6

7 A major determinant of health affecting the Aboriginal community in Kenora includes  
8 unreliable access to health care for remote reserves, which has previously been described in  
9 the literature by the National Collaborating Centre for Aboriginal Health[19]. Interviewees  
10 discussed efforts made to improve health care access, including doctors/nurses traveling to  
11 reserves and the helicopter service available for emergency transportation of patients to the  
12 hospital. Another determinant discussed by the interviewees included the pervasive effect of  
13 local residential schools. Kenora was home to three residential schools, the last one closing in  
14 1969[20]. Most of the Aboriginal community would have had family members who attended  
15 these schools. To this day, the historical implications of these schools continue to resonate  
16 within the community. The concept of historical trauma in one generation influencing  
17 subsequent generations has been described in the literature[21]. Survivors of the Canadian  
18 Residential School experienced trauma in the form of physical, mental and sexual abuse, as  
19 well as separation from their families. Not surprisingly, evidence has found that children of  
20 residential school attendees have higher rates of substance abuse and depressive  
21 symptoms[22][23]. Therefore, the history of Canadian residential schools should be part of a  
22 curriculum describing the current health issues of Aboriginal peoples in Northern Ontario.  
23  
24  
25  
26  
27  
28  
29  
30  
31  
32  
33  
34  
35  
36  
37  
38  
39  
40  
41

42 Another theme uncovered from the interview scripts included patient and provider  
43 specific factors influencing culturally safe care to the Aboriginal population. The  
44 interviewees emphasized respect, patience and understanding as important provider  
45 characteristics. The themes brought up by the interviewees are in keeping with IPAC and the  
46 RCPSC “core competencies” published in 2009. The “Communicator” section suggests that  
47 “reciprocity, equality, trust, respect, honesty and empathy” are required during interactions  
48 with the Aboriginal community, as with all patients[24]. Additionally, some interviewees  
49  
50  
51  
52  
53  
54  
55  
56  
57  
58  
59  
60



1  
2  
3 discussed the principle of “non-interference” as a fundamental backbone of Aboriginal  
4 culture and its impact on patient-provider relationships. Non-interference is a concept  
5 described by Rupert Ross in his book “Dancing with a Ghost” which encapsulates the  
6 importance of allowing individuals to make their own mistakes, and not to interfere with the  
7 behaviors of others[25]. This principle conflicts with the patriarchal aspects of Western  
8 health care, where doctors are supposed to interject and guide patients towards good health  
9 care decisions. Understanding cultural differences such as this can help doctors and health  
10 care employees understand why resistance may exist, and how to collaborate more  
11 effectively.  
12  
13  
14  
15  
16  
17  
18  
19  
20  
21

22  
23 The research was limited to one of many towns in the vast expanse of Northern  
24 Ontario. Each town/city in Northern Ontario undeniably encompasses its own set of values  
25 and nuances as does every Aboriginal community. The opinion of what should be  
26 incorporated within a curriculum was based on the perspectives of health care employees and  
27 community members, but did not include trainees. Strengths of the research included the use  
28 of a collaborative methodology, with community representatives as active research team  
29 members in project design and execution. A research agreement was created between the  
30 primary researchers and a local health care access centre (WNHAC) to ensure collaboration  
31 in regards to ownership, access and possession of all data obtained during the research. Our  
32 methodology (including the use of a research agreement) can be used as a template for future  
33 research conducted in Aboriginal or other communities in which a community based research  
34 initiative is needed. This study also provides an example for non-Aboriginal researchers  
35 about how to partner with Aboriginal communities in a meaningful way to bring about  
36 transformative change. Such partnerships and allegiances are a critical step towards  
37 reconciliation and towards moving forward with reciprocal respect to improve the care of  
38 Aboriginal peoples in Canada.  
39  
40  
41  
42  
43  
44  
45  
46  
47  
48  
49  
50  
51  
52  
53  
54  
55  
56  
57  
58  
59  
60

1  
2  
3 In summary, the interviewees agreed that pre-departure education on the social,  
4 political and historical aspects of Northern Ontario was needed. As outlined by IPAC and the  
5 RCPSC, education on providing culturally competent care is essential for health care  
6 employees who work with the Aboriginal community, whether in urban or rural  
7 environments. This concept has been reiterated with the recent publication of the “Truth and  
8 Reconciliation Report”[26]. In the executive summary under the health section, the  
9 commission calls upon medical schools to create Aboriginal health curriculum including the  
10 history of residential schools, and the government to enforce nation-wide cultural  
11 competency education for all health care employees. Educational efforts such as these will  
12 ensure culturally safe care is being provided to Canadian’s Aboriginal population and as a  
13 result, the health inequities in this population may start to improve.  
14  
15  
16  
17  
18  
19  
20  
21  
22  
23  
24  
25  
26  
27  
28  
29  
30  
31  
32  
33  
34  
35  
36  
37  
38  
39  
40  
41  
42  
43  
44  
45  
46  
47  
48  
49  
50  
51  
52  
53  
54  
55  
56  
57  
58  
59  
60

**Bibliography:**

1. MacMillan HL, ManMillan AB, Offord DR, et al. Aboriginal health. *CMAJ* 1996;155(11):1569-1578.
2. Adelson N. The embodiment of inequity: health disparities in aboriginal Canada. *Can J Public Health* 2005;96(2):S45-61.
3. Empathy, dignity and respect. Creating cultural safety for Aboriginal people in urban health care. Toronto ON: Health Council of Canada; December 2012. Available: [http://www.healthcouncilcanada.ca/rpt\\_det.php?id=437](http://www.healthcouncilcanada.ca/rpt_det.php?id=437) (accessed 2012 December 1)
4. Empathy, dignity and respect. Creating cultural safety for Aboriginal people in urban health care. Toronto ON: Health Council of Canada; December 2012. Available: [http://www.healthcouncilcanada.ca/rpt\\_det.php?id=437](http://www.healthcouncilcanada.ca/rpt_det.php?id=437) (accessed 2012 December 1)
5. Empathy, dignity and respect. Creating cultural safety for Aboriginal people in urban health care. Toronto ON: Health Council of Canada; December 2012. Available: [http://www.healthcouncilcanada.ca/rpt\\_det.php?id=437](http://www.healthcouncilcanada.ca/rpt_det.php?id=437) (accessed 2012 December 1)
6. Honouring the Truth, Reconciling for the Future: Summary of the Final Report of the Truth and Reconciliation Commission of Canada. Canada: Truth and Reconciliation commission of Canada; 2015. Available: [http://www.trc.ca/websites/trcinstitution/File/2015/Findings/Exec\\_Summary\\_2015\\_05\\_31\\_web\\_o.pdf](http://www.trc.ca/websites/trcinstitution/File/2015/Findings/Exec_Summary_2015_05_31_web_o.pdf) (accessed 2015 June 2)
7. McCready W, Jamieson J, Tran M, et al. The first 25 years of the Northwestern Medical Program. *Can J Rural Med* 2004;9(2):94-100.
8. Boelen C, Heck J. Defining and Measuring the Social Accountability of Medical Schools. Geneva: World Health Organization; 1995. Available from: [http://www.moph.go.th/ops/hrdj/Hrdj\\_no1/charles.html](http://www.moph.go.th/ops/hrdj/Hrdj_no1/charles.html) (accessed 2012 December 1)

- 1  
2  
3 9. Promoting culturally safe care for First Nations, Inuit, and Metis patients. A core  
4 curriculum for residents and physicians. Winnipeg MB & Ottawa ON: IPAC-RCPSC Core  
5 Curriculum Development Working Group; 2009. Available from: [http://ipac-amic.org/wp-](http://ipac-amic.org/wp-content/uploads/2011/10/21118_RCPSC_CoreCurriculum_Binder.pdf)  
6 [content/uploads/2011/10/21118\\_RCPSC\\_CoreCurriculum\\_Binder.pdf](http://ipac-amic.org/wp-content/uploads/2011/10/21118_RCPSC_CoreCurriculum_Binder.pdf) (accessed 2012  
7  
8  
9  
10  
11  
12 December 1)
- 13  
14 10. Kenora, Ontario (Code3560010) (table). Aboriginal Population Profile. 2006 Census.  
15  
16 Ottawa ON: Statistics Canada Catalogue no. 92-594-XWE; January 15, 2008. Available  
17  
18 from: [http://www12.statcan.ca/census-recensement/2006/dp-pd/prof/92-](http://www12.statcan.ca/census-recensement/2006/dp-pd/prof/92-594/index.cfm?Lang=E)  
19  
20  
21 [594/index.cfm?Lang=E](http://www12.statcan.ca/census-recensement/2006/dp-pd/prof/92-594/index.cfm?Lang=E) (accessed 2012 December 1)
- 22  
23 11. McCready W, Jamieson J, Tran M, et al. The first 25 years of the Northwestern  
24  
25 Medical Program. *Can J Rural Med* 2004;9(2):94-100.
- 26  
27 12. Quigley, D. Perspective: A Review of Improved Ethical Practices in Environmental  
28  
29 and Public Health Research: Case and Examples From Native Communities. *Health Educ*  
30  
31 *Behav* 2006;33:130.
- 32  
33 13. Davis S, Reid R. Practicing participatory research in American Indian communities.  
34  
35 *American Journal of Clinical nutrition* 1999;69(4):755s-759s.
- 36  
37 14. Maddocks I. Ethics in Aboriginal research: A model for minorities or for all? *The*  
38  
39 *medical journal of Australia* 1992;157:553-555.
- 40  
41  
42 15. Research Involving the First Nation, Inuit and Metis Peoples of Canada. Ottawa ON:  
43  
44 Panel on Research Ethics; 2013. Available from: [http://www.pre.ethics.gc.ca/eng/policy-](http://www.pre.ethics.gc.ca/eng/policy-politique/initiatives/tcps2-eptc2/chapter9-chapitre9/)  
45  
46 [politique/initiatives/tcps2-eptc2/chapter9-chapitre9/](http://www.pre.ethics.gc.ca/eng/policy-politique/initiatives/tcps2-eptc2/chapter9-chapitre9/) (accessed 2015 June 2)
- 47  
48  
49 16. Kuper A, Lingard L, Levinson W. Critically appraising qualitative research. *BMJ*  
50  
51 2008;337:a1035.Doi:10.1136/bmj.a1035.
- 52  
53  
54 17. Smith LT. *Decolonizing methodologies: research and indigenous people*. London:  
55  
56 Zed Books; 1999.
- 57  
58  
59  
60

- 1  
2  
3 18. Jacklin K, Strasser R, Peltier I, et al. From the community to the classroom: the  
4  
5 Aboriginal health curriculum at the Norther Ontario School of Medicine. *Can J Rural Med*  
6  
7 2014;19(4);143-150.  
8  
9  
10 19. Access to Health Services as a Social Determinant of First Nations, Inuit and Metis.  
11  
12 Prince George BC: National Collaborating Centre for Aboriginal Health; 2009. Available  
13  
14 from: [http://www.nccah-  
19  
20 ccnsa.ca/docs/fact%20sheets/social%20determinates/Access%20to%20Health%20Services  
21  
22 Eng%202010.pdf](http://www.nccah-<br/>15<br/>16 ccnsa.ca/docs/fact%20sheets/social%20determinates/Access%20to%20Health%20Services<br/>17<br/>18 Eng%202010.pdf) (accessed 2015 June 2)  
23  
24 20. List of residential schools. Waterloo ON: Indian Residential Schools Settlement -  
25  
26 Official Court Website; Available from: [http://www.residentialschoolsettlement.ca/  
29  
30 schools.html#Ontario](http://www.residentialschoolsettlement.ca/<br/>27<br/>28 schools.html#Ontario) (accessed 2015 March 3)  
31  
32 21. Evans-Campbell T. Historical trauma in American Indian/Native Alaska  
33  
34 communities: A multilevel framework for exploring impacts on individuals, families, and  
35  
36 communities. *Journal of Interpersonal Violence* 2008;23(3):316–338.  
37  
38 22. Bombay A. The intergenerational effects of Indian Residential Schools: Implications  
39  
40 for the concept of historical trauma. *Transcultural Psychiatry* 2014;51(3):320-338.  
41  
42 23. Bombay A., Matheson K., Anisman H. The impact of stressors on second generation  
43  
44 Indian Residential School Survivors. *Transcultural Psychiatry* 2011;48(4):367–391.  
45  
46 24. Promoting culturally safe care for First Nations, Inuit, and Metis patients. A core  
47  
48 curriculum for residents and physicians. Winnipeg MB & Ottawa ON: IPAC-RCPSC Core  
49  
50 Curriculum Development Working Group; 2009. Available from: [http://ipac-amic.org/wp-  
53  
54 content/uploads/2011/10/21118\\_RCPSC\\_CoreCurriculum\\_Binder.pdf](http://ipac-amic.org/wp-<br/>51<br/>52 content/uploads/2011/10/21118_RCPSC_CoreCurriculum_Binder.pdf) (accessed 2012  
55  
56 December 1)  
57  
58 25. Ross, R. *Dancing with A Ghost: Exploring Indian Reality*. Canada: Penguin; 2006.  
59  
60

1  
2  
3  
4  
5  
6  
7  
8  
9  
10  
11  
12  
13  
14  
15  
16  
17  
18  
19  
20  
21  
22  
23  
24  
25  
26  
27  
28  
29  
30  
31  
32  
33  
34  
35  
36  
37  
38  
39  
40  
41  
42  
43  
44  
45  
46  
47  
48  
49  
50  
51  
52  
53  
54  
55  
56  
57  
58  
59  
60

26. Honouring the Truth, Reconciling for the Future: Summary of the Final Report of the Truth and Reconciliation Commission of Canada. Canada: Truth and Reconciliation commission of Canada; 2015. Available: [http://www.trc.ca/websites/trcinstitution/File/2015/Findings/Exec\\_Summary\\_2015\\_05\\_31\\_web\\_o.pdf](http://www.trc.ca/websites/trcinstitution/File/2015/Findings/Exec_Summary_2015_05_31_web_o.pdf) (accessed 2015 June 2)

Confidential

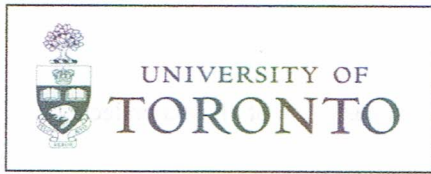

**Appendix A: Research Agreement for the project:**

**Northern Perspectives of medical elective tourism: Creating a curriculum for medical students and residents traveling to Northern communities**

Research, Data, Statistics, and Publication Agreement Between

***Waasegiizhig Nanaandawe'iyewigamig (WNHAC)***

and

***the Primary Investigators of this research project, including the Core Collaborator Group***

**Purpose of Agreement:**

This research agreement will ensure the project "*Northern Perspectives of medical elective tourism: creating a curriculum for medical students and residents traveling to Northern communities*" is respectful to the cultures, languages, knowledge, and values of the Aboriginal Community in Kenora as represented by the **WNHAC**. This agreement respects that the Aboriginal community has a right to self-determined data management and governance. The agreement acknowledges the desire of Dr. Sarah Coke to conduct collaborative research by involving community representatives as active research team members in all aspects of this project.

**Agreement Principals:**

- Maintaining mutual respect and accountability between the parties
- Recognize the complementary and distinct expertise, responsibilities, mandates, and accountability structures of each party
- Ensure the highest standards of research ethics, including the acknowledgement of **WNHAC** specific principles of self-determined data management
- Respect the individual and collective privacy rights of **WNHAC** staff
- Recognize the value and potential of research that is scientifically and culturally validated



1  
2  
3  
4  
5  
6  
7  
8  
9  
10  
11  
12  
13  
14  
15  
16  
17  
18  
19  
20  
21  
22  
23  
24  
25  
26  
27  
28  
29  
30  
31  
32  
33  
34  
35  
36  
37  
38  
39  
40  
41  
42  
43  
44  
45  
46  
47  
48  
49  
50  
51  
52  
53  
54  
55  
56  
57  
58  
59  
60

**Ownership:**

- The principle investigators acknowledge that the **WNHAC** is the rightful custodian of all data collected from *Aboriginal clients*
- *Both parties respect that the individual interviewee (including Aboriginal interviewees) is the rightful owner of all data collected through the interview process*

**Collaboration:**

- The **WNHAC** agrees to undertake the research roles, responsibilities and activities described as part of the collaborative research methods
- The principle investigator agrees to the inclusion of project team representatives from the **WNHAC** as co-investigators

**Access:**

- The principle investigator will be required to protect the data from unauthorized use and act as stewards on behalf of the rightful owner, *the Aboriginal person*
- The **WNHAC** has provided prior consent to Dr. Sarah Coke to maintain a copy of the data generated by this project in accordance with the study protocol reviewed and approved by the Research Ethics Board for the purpose of qualitative research

**Possession:**

- The principle investigators will provide the **WNHAC** the opportunity for review of any research reports before the submission of reports for publication
- The representatives from the **WNHAC**, upon their review, will be co-investigators on any and all publications, reports, documents, or other material and or presentations from which this data is utilized

This agreement will be signed by both parties in person when the primary investigator is in Kenora. Copies collectively bearing the signatures of all parties shall constitute the fully executed agreement.

Signature:  (Anita Cameron, Executive Director WNHAC)

Signature: Sarah Coke (Sarah Coke, primary investigator)



**Interview Guide:**

We gathered data for this project using semi-structured interviews. In the table below we have listed the research areas addressed along with examples of questions.

**Research Areas:****Examples of Interview Questions:**

|                                                                                                                                                    |                                                                                                                         |
|----------------------------------------------------------------------------------------------------------------------------------------------------|-------------------------------------------------------------------------------------------------------------------------|
| <i>What is the experience of community members in terms of interacting with medical students or residents from Southern Ontario</i>                | 1) Tell me about your experience with health care in Kenora                                                             |
|                                                                                                                                                    | 2) Have you encountered students or residents traveling from Southern Ontario?                                          |
|                                                                                                                                                    | 3) What was your experience/interaction like with these students/residents?                                             |
| <i>Do medical elective tourists historically provide culturally safe care to the community</i>                                                     | 1) In your experience, were residents/students adequately prepared to serve the community's needs?                      |
|                                                                                                                                                    | 2) Did they appreciate the diversity within the community?                                                              |
|                                                                                                                                                    | 3) Are you aware of any negative experiences between students/residents coming from Southern Ontario and the community? |
| <i>What should be incorporated into a formal curriculum for medical elective tourists wishing to travel to Kenora or other similar communities</i> | 1) What are the essential qualities of Kenora that people from Southern Ontario should appreciate prior to coming?      |
|                                                                                                                                                    | 2) Are there are books/articles they should read that would help them to understand the community?                      |
